# Supplementary material
Source: Springer Nature journal article supplement (https://www.springermedizin.de/resource/supplementary/12957_2011_925_MOESM3_ESM.pdf/9562134)
Supplement: MOESM3 [file 9562134]

FTS

2011/03/04  
13:01:00

F14

AVE

1/60

NH

001
